# Supplementary material for: Accurate and sensitive detection of dipeptidyl peptidase-IV activity by liquid chromatography with fluorescence detection
Source: Royal Society of Chemistry journal article supplement (doi:10.1039/c9ay02610j), 2020-01-01
Supplement: c9ay02610j1.pdf [file c9ay02610j1.pdf]

## Supplementary Material

### **Accurate and sensitive detection of dipeptidyl peptidase-IV activity by liquid chromatography with fluorescence detection**

Hong Ma<sup>1, a</sup>, Xing-Kai Qian<sup>1, b</sup>, Jing Zhang<sup>b</sup>, Qiang Jin<sup>b</sup>, Li-Wei Zou<sup>b, \*</sup>, Shu-Qing Liu<sup>a, \*</sup>, Guang-Bo Ge<sup>b</sup>

<sup>a</sup>Department of Biochemistry and Molecular Biology, Dalian Medical University, Dalian 116044,

<sup>b</sup>Institute of Interdisciplinary Integrative Medicine Research, Shanghai University of Traditional Chinese Medicine, Shanghai, 201203, China

<sup>1</sup>These authors contributed equally to this work.

\*Corresponding author: E-mail address: chemzlw@shutcm.edu.cn (Li-wei Zou), [shuiqngliu@dmu.edu.cn](mailto:shuiqngliu@dmu.edu.cn) (Shu-qing Liu)

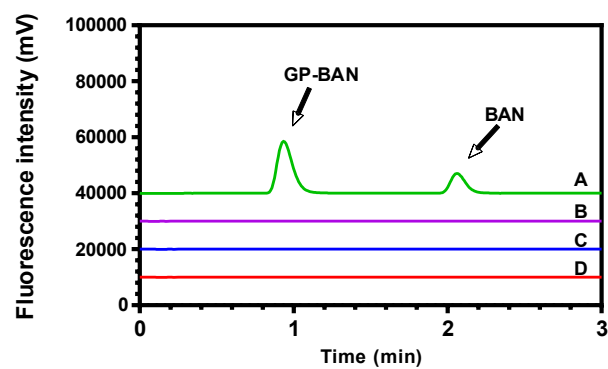

Fig. S1. LC elution patterns of blank enzyme source.

(A) Stock solutions of GP-BAN and BAN in PBS and acetonitrile (1 : 1, V/V), (B) Blank PBS and acetonitrile (1 : 1, V/V), (C) Blank cell homogenate (1 mg/mL) in PBS and acetonitrile (1 : 1, V/V), (D) Blank human kidney microsome (0.1 mg/mL) in PBS and acetonitrile (1 : 1, V/V).

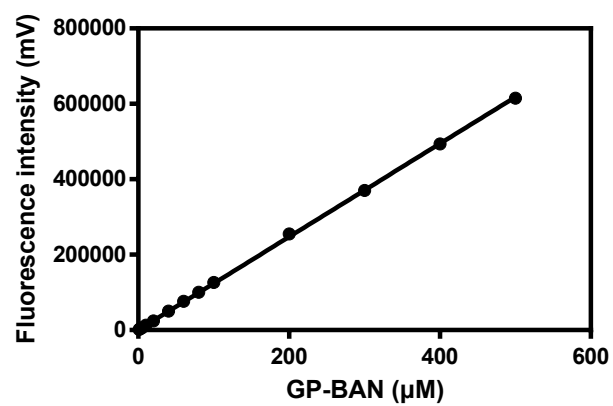

Fig S2. Standard curves for GP-BAN in PBS and acetonitrile (v/v 1:1)

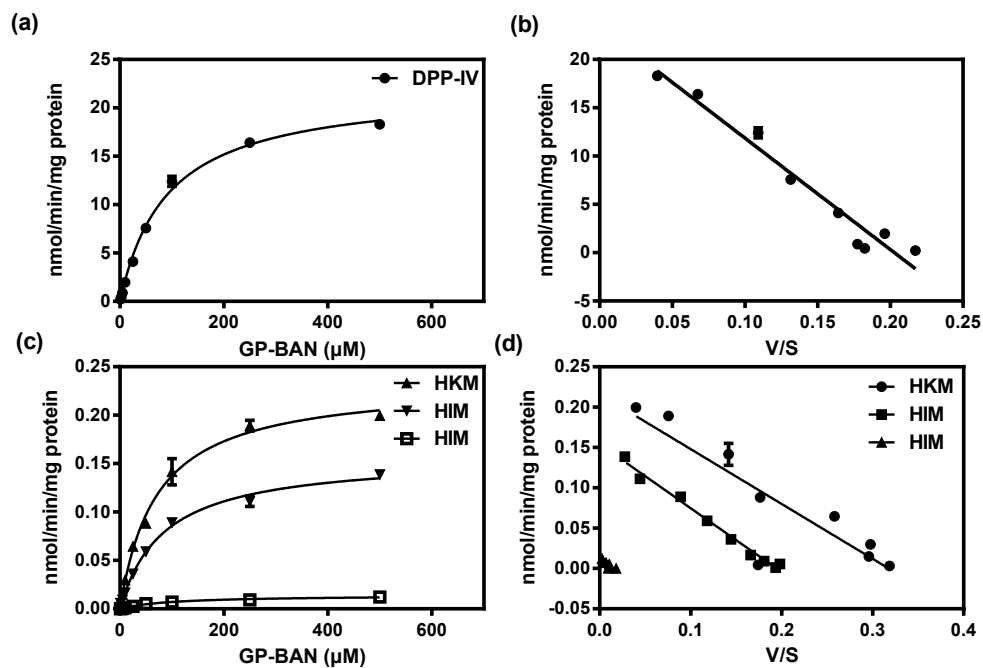

Fig S3. Michaelis-Menten kinetic plots (a and c) and Eadie-Hofstee plots (b and d) of GP-BAN hydrolysis in DPP-IV, HKM, HIM and HLM. The supernatant of reaction mixtures were subjected to LC system to measure fluorescence intensity.

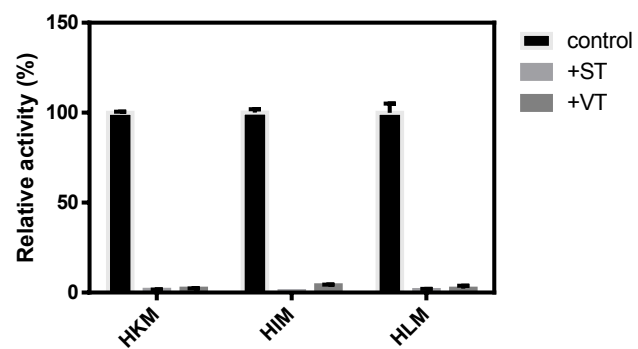

Fig. S4. Effects of selective inhibitors sitagliptin (100  $\mu$ M) and vildagliptin (100  $\mu$ M) on GP-BAN hydrolysis in human tissues microsome.

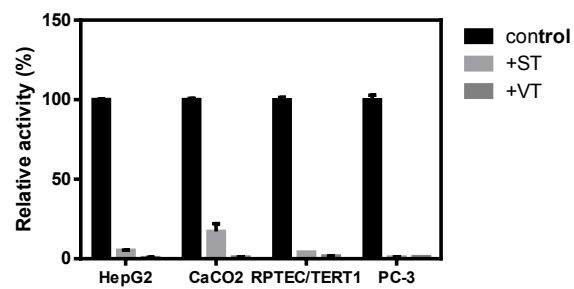

Fig S5. Effects of selective inhibitors sitagliptin (100  $\mu$ M) and vildagliptin (100  $\mu$ M) on GP-BAN hydrolysis in Cell lines homogenates.

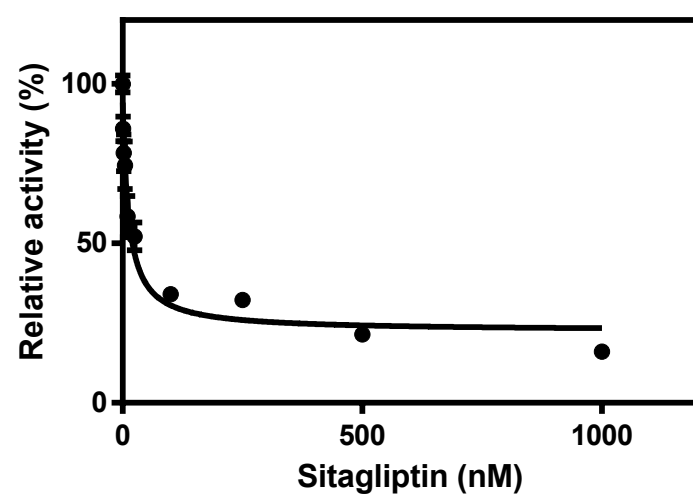

Fig. S6. The inhibitory effects of sitagliptin towards DPP-IV activities.

Table S1. Stability of BAN in reaction mixture.

| Sample   | 100 $\mu$ M BAN RSD (%) | 10 $\mu$ M BAN RSD (%) | 1 $\mu$ M BAN RSD (%) | Avg RSD (%) |
|----------|-------------------------|------------------------|-----------------------|-------------|
| HepG2 S9 | 99.30                   | 99.70                  | 101.95                | 101.95      |
| HKM      | 99.89                   | 98.60                  | 100.56                | 100.56      |
